# Supplementary material for: Mesenchymal stromal cells mitigate liver damage after extended resection in the pig by modulating thrombospondin-1/TGF-β
Source: PubMed Central journal article supplement (PMC8642541; doi:10.1038/s41536-021-00194-4), 2021-12-03
Supplement: 41536_2021_194_MOESM2_ESM.pdf [file 41536_2021_194_MOESM2_ESM.pdf]

**Title: Mesenchymal stromal cells mitigate liver damage after extended liver resection in the pig by modulating thrombospondin-1/TGF- $\beta$**

**Authors:**

Sandra Nickel, Sebastian Vlaic, Madlen Christ, Kristin Schubert, Reinhard Henschler, Franziska Tautenhahn, Caroline Burger, Hagen Kühne, Silvio Erler, Andreas Roth, Christiane Wild, Janine Brach, Seddik Hammad, Claudia Gittel, Manja Baunack, Undine Lange, Johannes Broschewitz, Peggy Stock, Isabella Metelmann, Michael Bartels, Uta Pietsch, Sebastian Krämer, Uwe Eichfeld, Martin von Bergen, Steven Dooley, Hans-Michael Tautenhahn, Bruno Christ

**Supplementary Results**

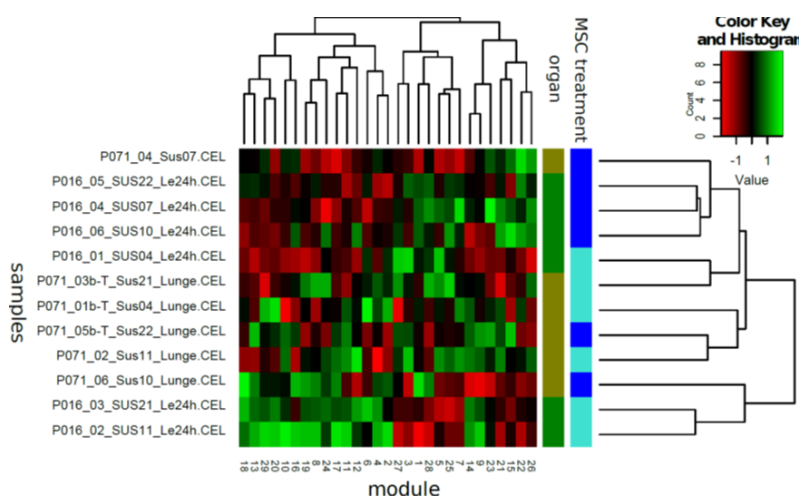

**Supplementary Figure 1. EigenGenes For SubModules Heatmap Processed.** A heatmap of the scaled expression values for each module derived from the topological clustering based on the general topological overlap measure showed that the samples clustered mostly by treatment, not by organ.

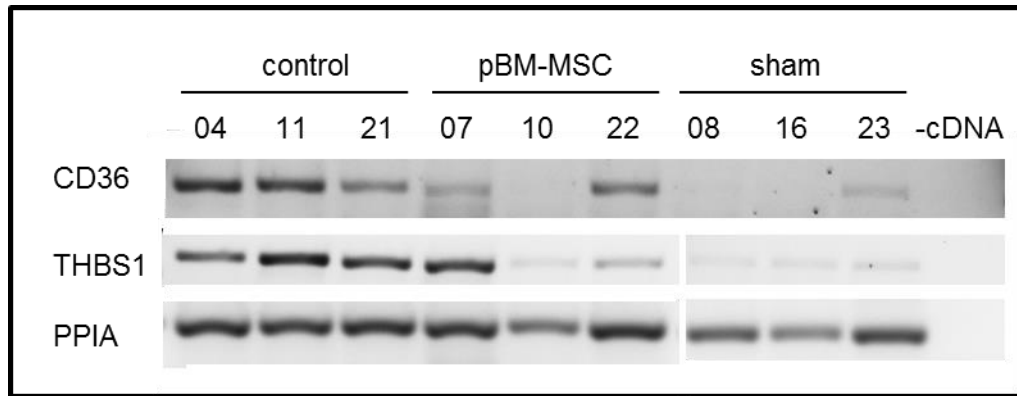

**Supplementary Figure 2. MSC treatment attenuates the increase in CD36 and THBS1 mRNA levels after ePHx.** Semiquantitative PCR analysis of tissue lysates from 3 different animals in each group. The representative electrophoretic gels shown here were used for semi-quantitative calculation of relative mRNA abundance as shown in Fig. 3c of the main manuscript. Figures above the gels delineate numbers of pigs used in the resp. experiment. Samples in each line were run on the same gel and were processed in parallel.

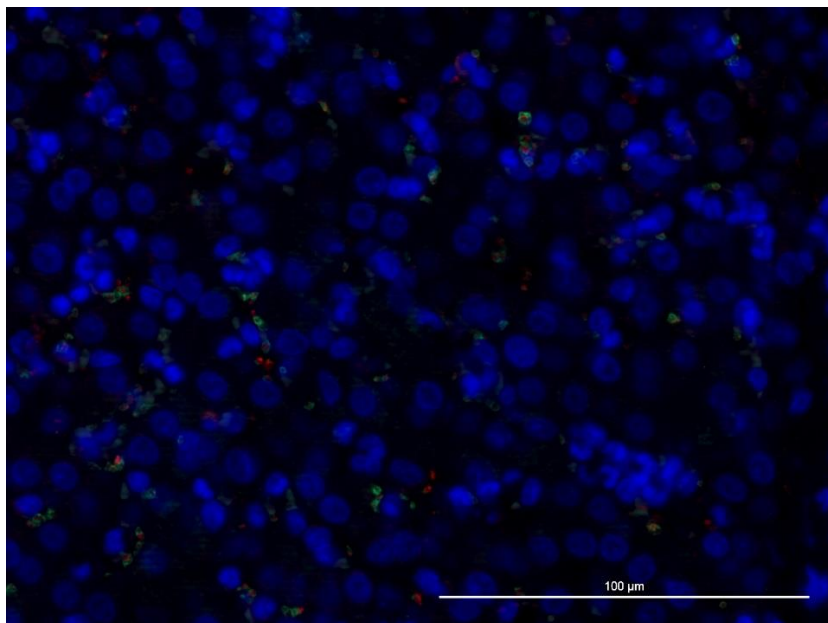

sham

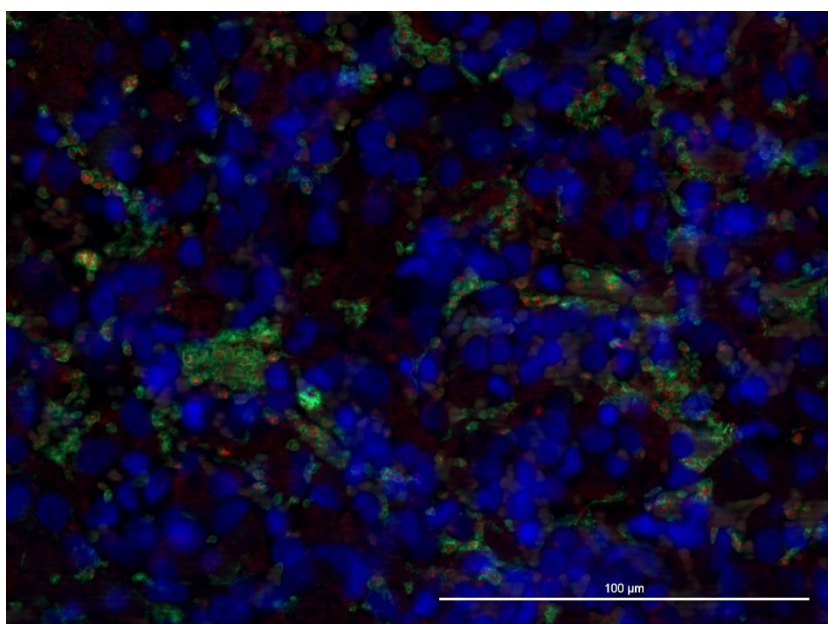

control

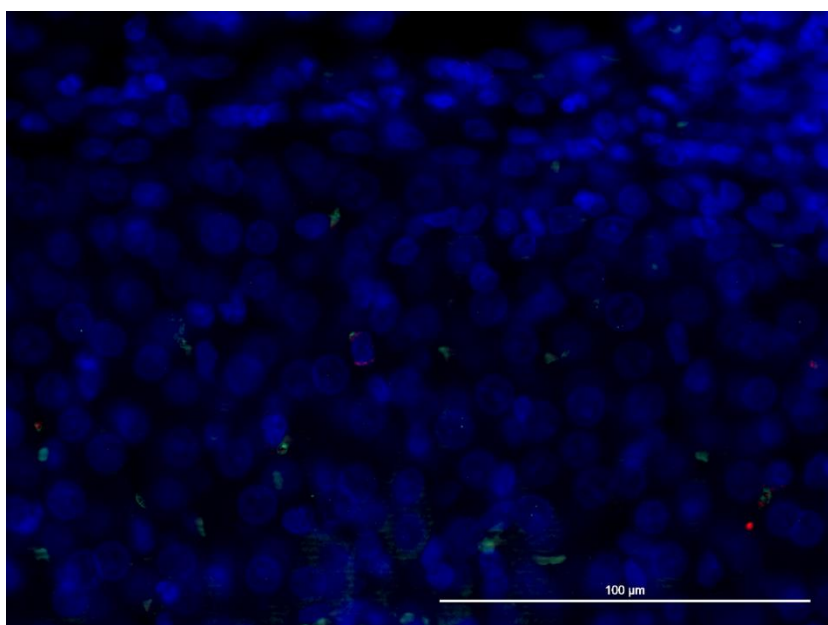

pBM-MSc

**Supplementary Figure 3. Attenuation of the increase of platelets after ePHx in the liver by treatment with pBM-MSC.** Thrombocytes in liver were visualized 24 h after ePHx by immunofluorescent detection of CD42b as a marker (green fluorescence). THBS1 (red fluorescence) co-localized with CD42b indicating thrombocytes as potential source of THBS1. As compared with sham-treated animals, ePHx markedly increased platelets in the liver (control), which was abrogated again by treatment with pBM-MSC. Original magnification – 40x. Scale bar – 100  $\mu$ m.

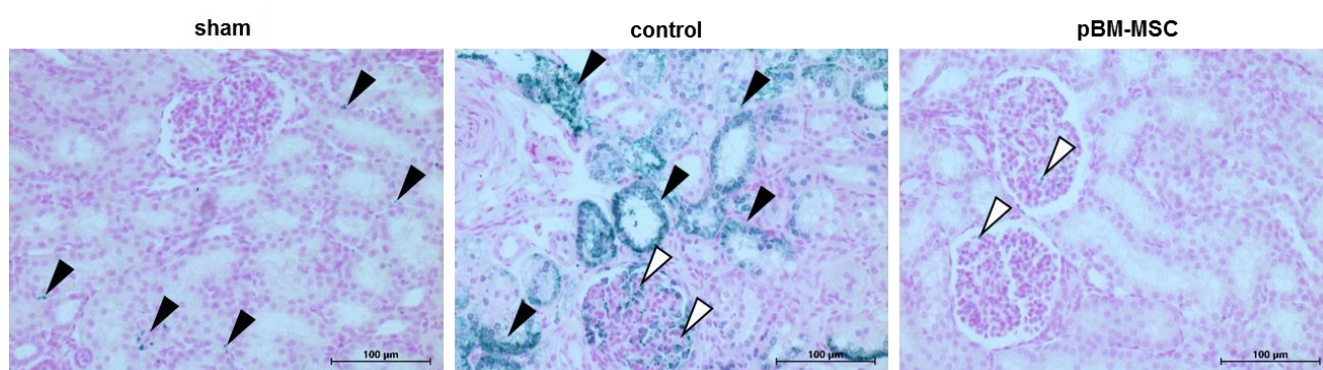

**Supplementary Figure 4. Thrombocytes in the kidney after ePHx with and without MSC treatment.** Immunohistochemical detection of thrombocytes using the CD42b antibody in kidneys of sham (left), control (middle), and MSC-treated (right) pigs at 24 h after liver surgery. Images show 20x original magnifications of representative organ tissue slices from 3 pigs per group. Black and white arrowheads indicate tubular and glomerular staining, resp. Scale bar – 100  $\mu$ m.

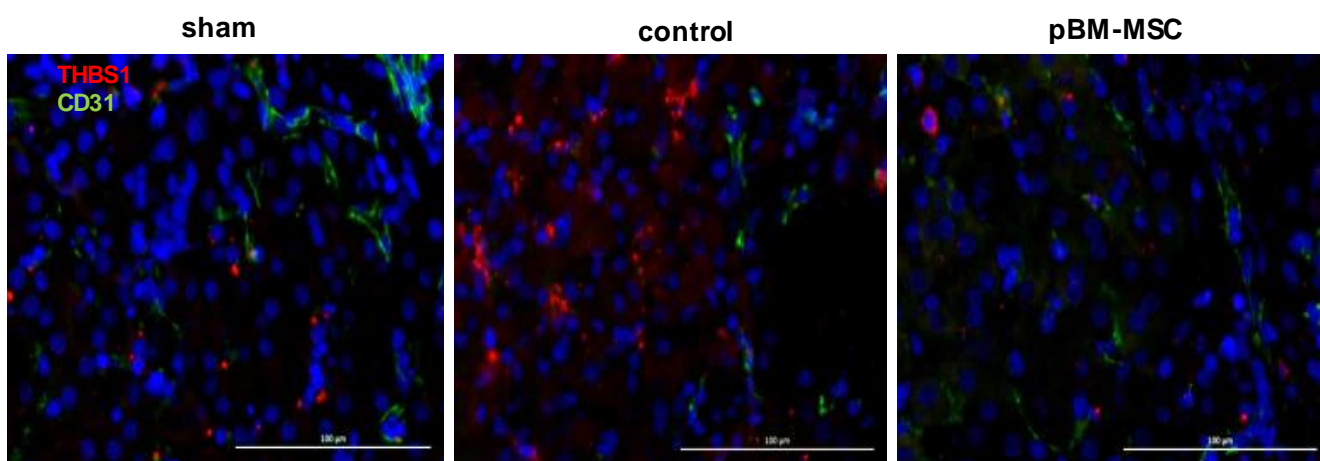

**Supplementary Figure 5. THBS1 does not co-localize with CD31 on endothelial cells.** THBS1 was visualized 24 h after ePHx by immunofluorescent detection (red fluorescence). Endothelia were counterstained by detection of CD31 (green fluorescence). Original magnification – 20x. Scale bar – 100  $\mu$ m.

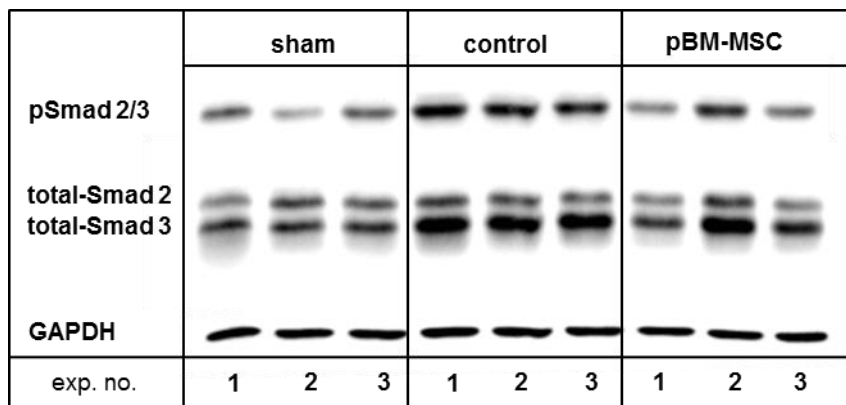

**Supplementary Figure 6. MSC treatment attenuates the increase in pSmad 2/3 protein levels after ePHx.** Western blot analysis of tissue lysates from 3 different animals in each group. The representative immunoblots shown here were used for semi-quantitative calculation of relative protein expression as shown in Fig. 5d of the main manuscript. Samples in each line were run on the same gel and processed in parallel.

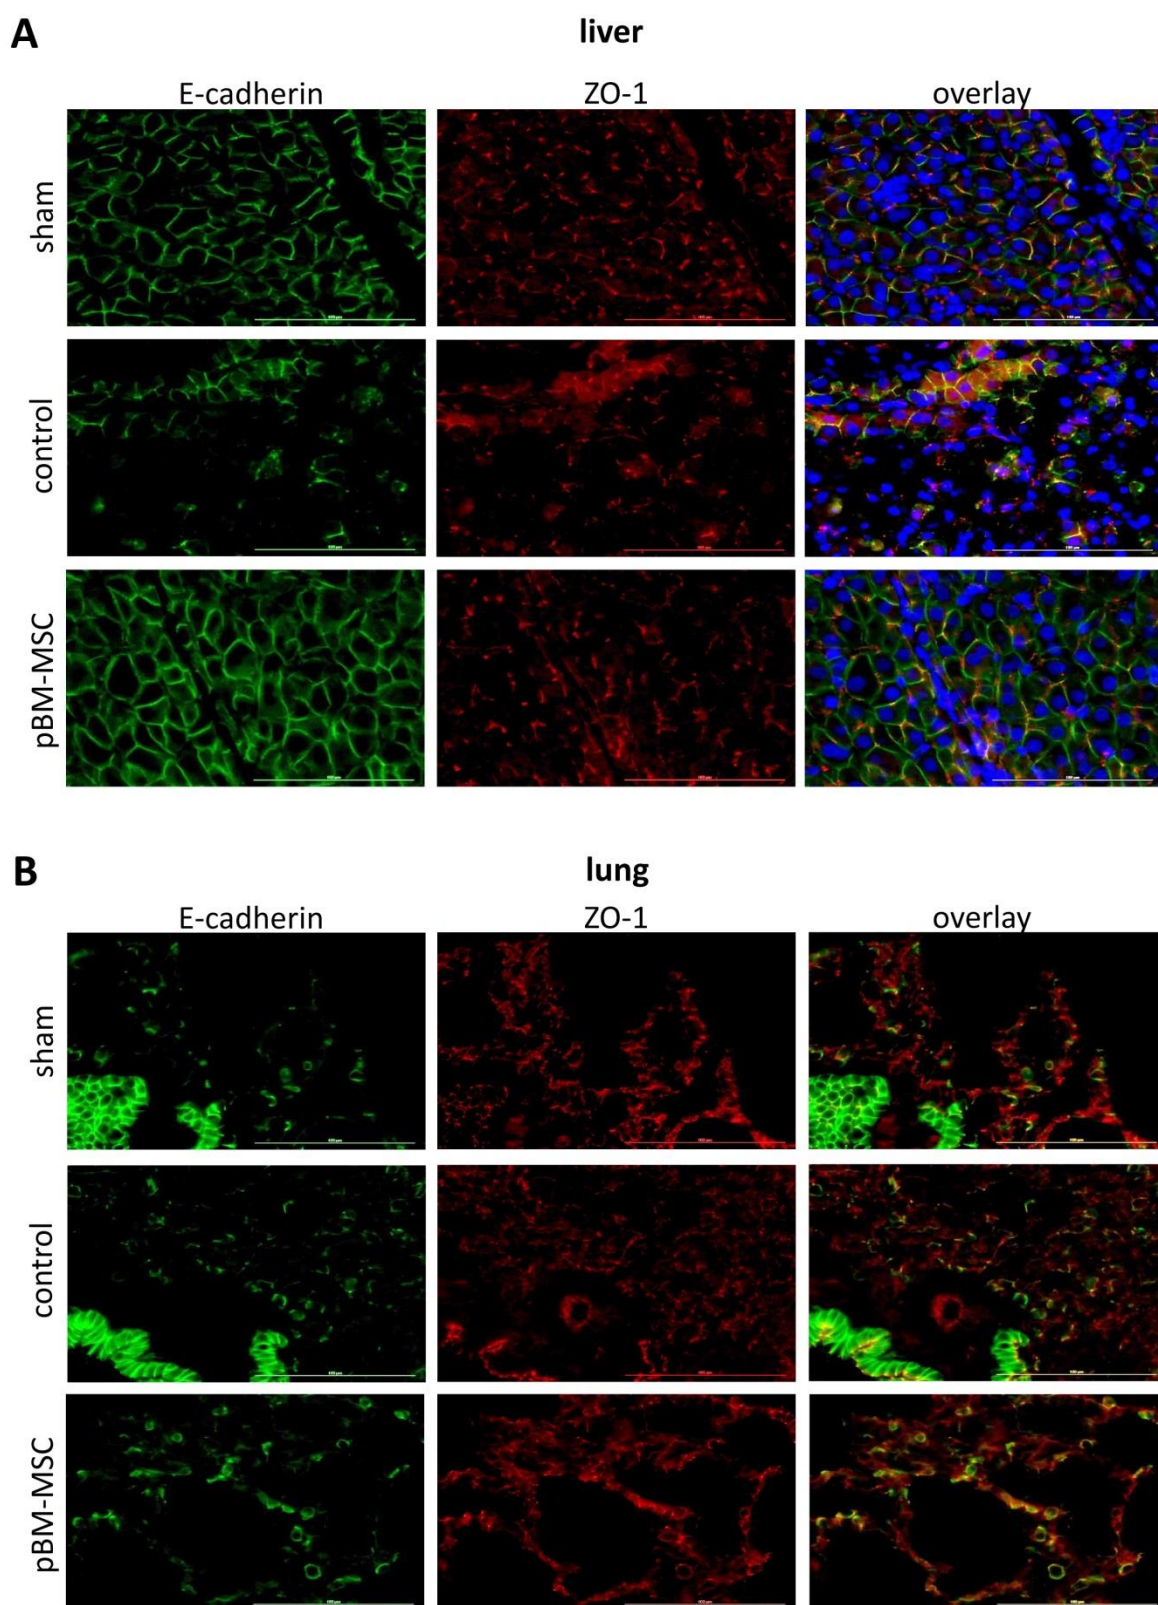

**Supplementary Figure 7. MSC treatment protects tight junctions from damage after ePHx.** Immunofluorescent detection of E-cadherin and ZO-1 in (A) liver and (B) lung of sham-, control-, and MSC-treated pigs; E-cadherin (left panels, green), ZO-1 (middle panels, red), and overlay with DAPI co-stains (right panels). Tissue samples were taken at 24 h after ePHx. In the livers, E-cadherin and ZO-1 fade away after resection (middle panels) in comparison with sham-treated animals (upper panels). In lung, ZO-1 features discontinuity

after liver resection. Both signs of tissue damage are attenuated by the treatment with pBM-  
MSC (middle vs. bottom panels). Images are representative for each 3 slices out of the organs  
from 3 animals per group. Original magnification – 20x.

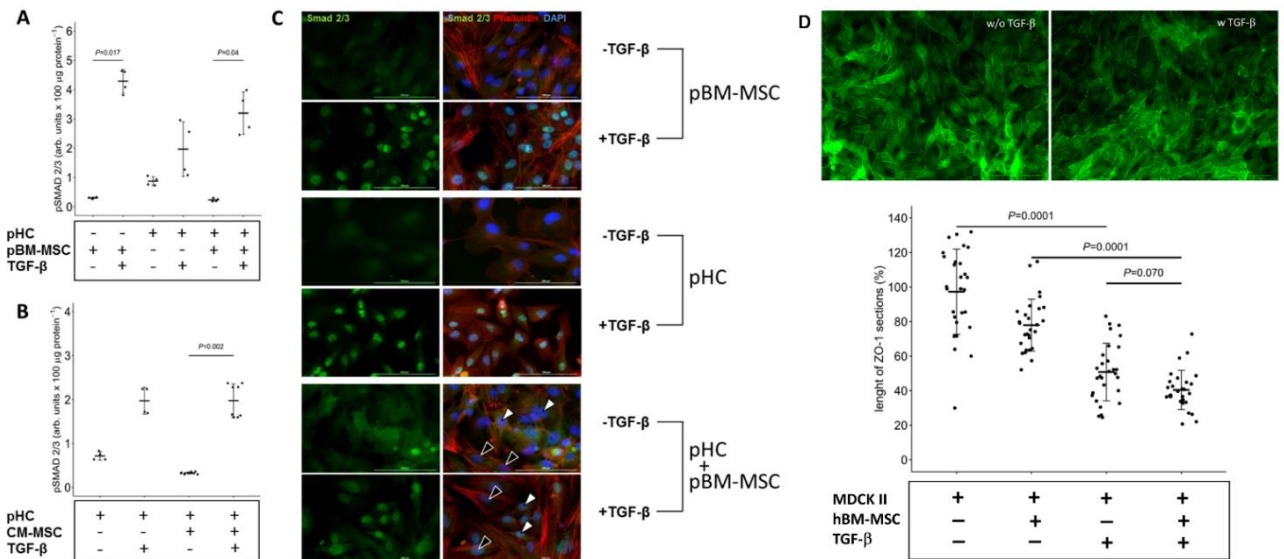

**Supplementary Figure 8. pBM-MSC do not inhibit TGF-β signaling in primary porcine hepatocytes.** (A) Hepatocytes and pBM-MSC were cultured alone or in combination (1:1). TGF-β (1 ng/mL) was included and pSmad 2/3 measured by ELISA. (B) Conditioned medium from pBM-MSC (CM-MSC) was used instead of pBM-MSC. In (C), TGF-β signaling was assessed in co-cultures of porcine hepatocytes and pBM-MSC by fluorescent immunocytochemical staining of nuclear translocation of Smad 2/3 using an antibody detecting the unphosphorylated Smad 2/3 (green). Actin was stained with phalloidin to facilitate detection of cells (red). pBM-MSC (black arrowheads) were discriminated from hepatocytes (white arrowheads) by differences in nuclear size (DAPI stain, blue) and actin staining. In the presence of TGF-β, nuclear translocation is observed in both single cultures and co-cultures. (D) hBM-MSC do not inhibit TGF-β action in MDCK II cells. MDCK II cells and hBM-MSC were co-cultured (1:1). MDCK II cells were treated or not with TGF-β (5 ng/mL) for 20 h in order to induce EMT as shown immunocytochemically by the diminution of membranous ZO-1 (upper panels). For the quantification, the ZO-1 positive stain on microscopic pictures was manually delineated, and total lengths quantified using Image J. The length of ZO-1 contacts in cells without TGF-β was set to 100 %, to which values with TGF-β are relative. In each group, 28 different visual fields out of three independent cell culture experiments were used for calculations (lower panel). Values represent means±SEM and are significantly different at  $P \leq 0.05$  as indicated (statistics: one-way ANOVA).

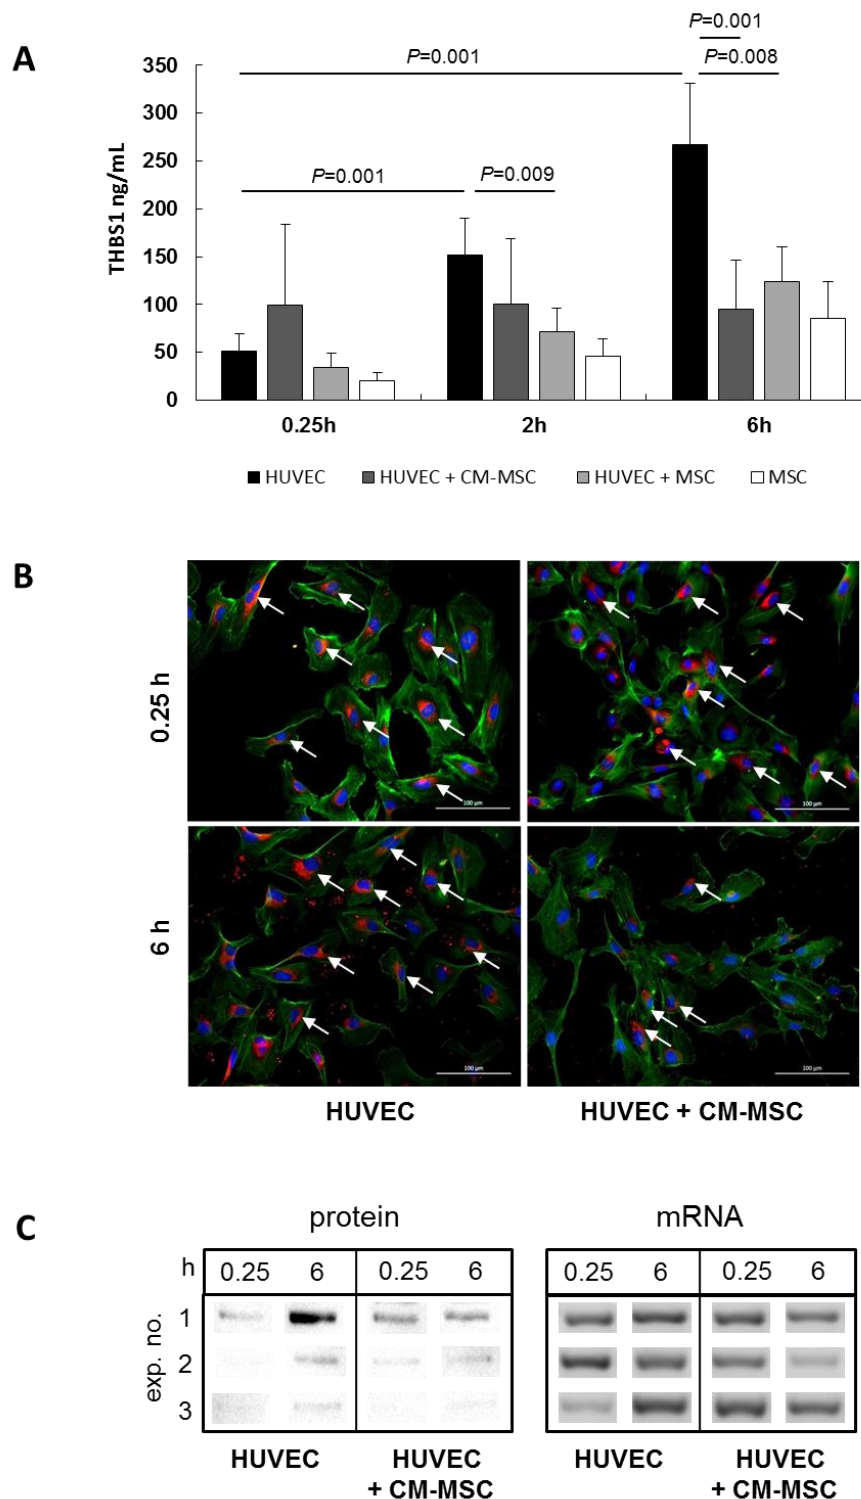

**Supplementary Figure 9.** pBM-MSC inhibit THBS1 secretion from HUVEC. (A) THBS1 secretion from HUVEC into the supernatant medium was determined by ELISA at the times indicated either in mono-cultures of HUVEC (HUVEC) and MSC (MSC), or in co-culture of both (HUVEC+MSC), or in conditioned medium derived from MSC (HUVEC+CM-MSC). Values are means±SEM (n=6; statistics: one-way ANOVA after logarithmic transformation of the dataset) and are significantly different at the *P*-levels as indicated. (B) THBS1 was visualized in HUVEC by immunofluorescence (red, arrows). The actin cytoskeleton was visualized with phalloidin (green), and nuclei with DAPI (blue). (C) THBS1 expression was



evaluated both on the protein and mRNA level by Western blotting and RT-PCR. The blots show results from 3 different independent cell culture experiments. Lysates to isolate protein and RNA were prepared from the HUVEC at two different time-points (0.25 and 6 h of culture) of treatment with or without MSC-derived conditioned medium (CM-MSC). Samples in each line were run on the same gel and processed in parallel.

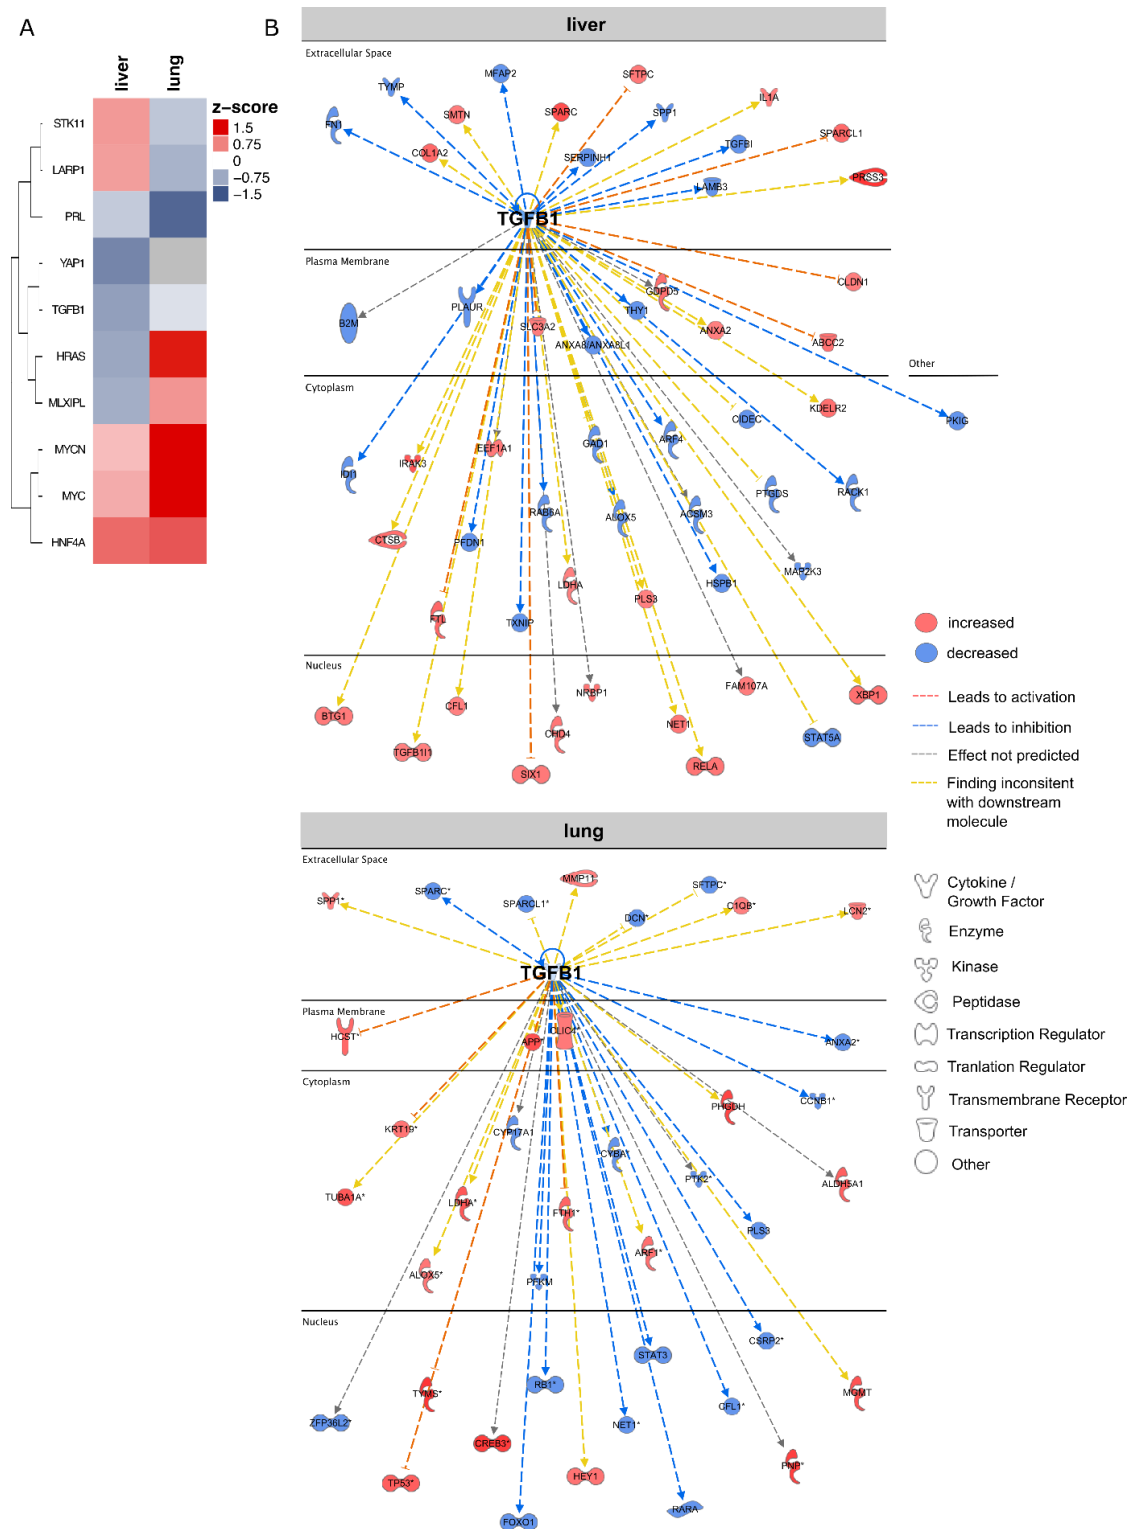

regulators ( $P$ -value  $\leq 0.05$ ) affected by MSC-treatment in liver and lung were predicted *in silico* using Ingenuity Pathway Analysis. (B) The regulatory network of TGF- $\beta$  target genes in liver and lung were visualized based on their cellular compartments.

## Supplementary Methods

### Surgical procedure

Adult male German landrace pigs were obtained from the farm product company Kitzen (Pegau, Germany) and were housed at the Experimental Centre of the Faculty of Medicine, University of Leipzig, under a 12 h circadian rhythm at 25°C receiving a standard pig diet for at least 3 days. Animals were starved 24 h before surgery, and underwent a veterinary inspection verifying body weight (25-30 kg), temperature (below 40°C), and general health condition. They received a premedication (ketamine 15 mg/kg BW, atropine 0.01 mg/kg BW, and midazolam 0.5 mg/kg BW) to facilitate transportation into the operating theatre. A venous catheter was placed in the dorsal *V. auricularis* (Supplementary Figure 11-1) and total venous anesthesia and analgesia (midazolam 1 mg/kg BW/h, sufentanil 0.5  $\mu$ g/kg BW/h, ketamine 5-15 mg/kg BW/h, pancuronium bromide 80  $\mu$ g/kg BW/h) was administered through the catheter. After fixing the sedated animal onto the operating table (Supplementary Figure 11-2), a tracheotomy (Supplementary Figure 11-3) for mandatory ventilation using a respiration apparatus (type Julian, Drägerwerk AG & Co. KGaA, Lübeck, Germany) was performed (Supplementary Figure 11-4). In addition, a central venous catheter was fixed in the *V. jugularis interna* (Supplementary Figure 11-5) for the central venous application of the total anesthesia and analgesia medication. The catheter served also for infusion of control solution (Ringer's acetate, Gelafusal® (Serumwerk Bernburg AG, Bernburg, Germany), and dextrose 5%; 6:3:1) in the control, and pBM-MSCT transfusion in the treatment groups. The abdominal cavity was opened by an incision along the *linea alba* (60 cm) (Supplementary Figure 11-6+7). Liver lobes were mobilized (Supplementary Figure 11-8), and portocaval anastomosis (Supplementary Figure 11-9) was established to enable the gastrointestinal blood bypass of

the liver. The *ligamentum hepatoduodenale* was clamped (Supplementary Figure 11-10) to stop the venous and arterial blood flow into the liver (Pringle's manoeuvre). 70% of the total liver mass were removed by resecting the left and medial liver lobes (Supplementary Figure 11-11). Coagulation of the resection areas was achieved using bipolar forceps (Supplementary Figure 11-12) and hemostyptics (TABOTAMP Fibrillar, Johnson & Johnson GmbH, Norderstedt, Germany). After a total time of 150 min warm ischemia, the portocaval anastomosis was occluded (Supplementary Figure 11-13) and the clamping of the *Lig. hepatoduodenale* was released. Then, the abdominal cavity was closed (Supplementary Figure 11-14) and pBM-MSO or Ringer's solution (6:3:1 Ringers acetate, Gelafusal® (Serumwerk Bernburg AG, Bernburg, Germany), and dextrose 5%) were infused. All animals were subjected to intensive care monitoring and treatment for 24 h. To maintain cardiovascular performance as well as glucose homeostasis, animals were supplemented with Norepinephrine and glucose as appropriate. After 24 h, animals were euthanased by a lethal dose of intravenous anesthesia and analgesia medication in addition to intravenous injection of potassium chloride solution. Organs (lung (Supplementary Figure 11-15), liver remnant (Supplementary Figure 11-16)) were harvested at the end of the experiment.

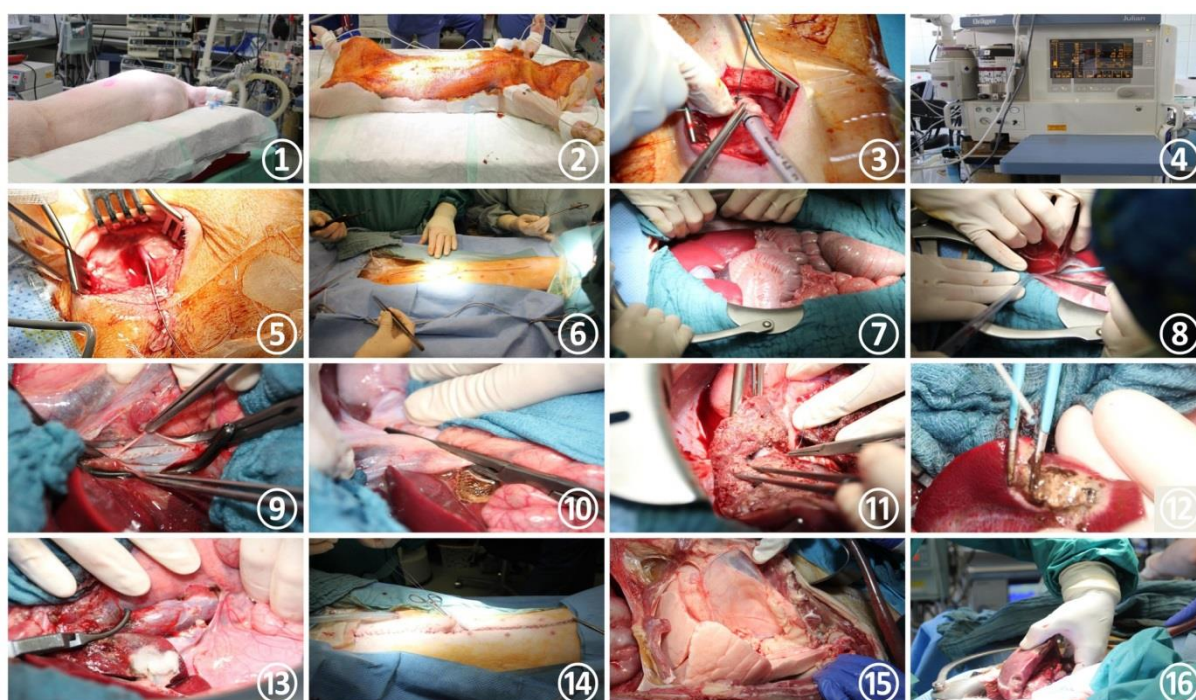

**Supplementary Figure 11.** Surgical procedure of extended liver resection in the pig. (1) Positioning of the venous catheter in the dorsal V. auricularis for total intravenous anesthesia. (2) Fixation of the sedated animal onto the operating table. (3) Tracheotomy. (4) Mandatory ventilation apparatus. (5) Cannulation of the V. jugularis interna for positioning of the central venous catheter placement. (6) Incision along the linea alba and (7) positioning of retractor. (8) Mobilization of liver lobes. (9) Portocaval anastomosis using 6-0 monofile non resorbable suturing material in a running suture technique. (10) Occlusion of the ligamentum hepatoduodenale (Pringle's manoeuvre). (11) Resection of the left and medial liver lobes. (12) Coagulation of resection surface. (13) Occlusion of the portocaval anastomosis after 150 min warm ischemia time. (14) Closure of the abdominal cavity. (15) Harvest of lung and (16) remnant liver.

**Supplementary Table 1. Summary of antibodies and dilutions used in this study.**

| Antibody                           | Species | Dilution | Cat. No.    | Supplier                             |
|------------------------------------|---------|----------|-------------|--------------------------------------|
| <b>Immunohistochemistry</b>        |         |          |             |                                      |
| E-cadherin                         | mouse   | 1:200    | 610182      | BD, Heidelberg, Germany              |
| N-cadherin                         | rabbit  | 1:200    | 04-1126     | Millipore, Darmstadt, Germany        |
| ZO-1                               | rabbit  | 1:150    | 44-2200     | InVitrogen, Carlsbad, CA, USA        |
| CD31                               | rabbit  | 1:75     | ab28364     | Abcam, Cambridge, England            |
| CD42b                              | rabbit  | 1:200    | ab183345    | Abcam, Cambridge, England            |
| $\alpha$ -SMA                      | rabbit  | 1:250    | ab5694      | Abcam, Cambridge, England            |
| THBS1                              | mouse   | 1:100    | ab1823      | Abcam, Cambridge, England            |
| Smad2/3                            | rabbit  | 1:500    | 8485S       | Cell Signaling, Cambridge, England   |
| TGF- $\beta$                       | rabbit  | 1:200    | bs4538R     | Fisher-Scientific, Waltham, MA, USA  |
| Heparan sulfate                    | mouse   | 1:200    | ab23418     | Abcam, Cambridge, England            |
| Cy3-labeled anti-mouse             | goat    | 1:200    | 115-165-003 | Dianova, Hamburg, Germany            |
| AlexaFluor 488-labeled anti-rabbit | goat    | 1:200    | A11008      | Life Technologies, Carlsbad, CA, USA |
| Biotin-labeled anti-mouse          | goat    | 1:200    | 115-065-003 | Dianova, Hamburg, Germany            |
| Biotin-labeled anti-rabbit         | donkey  | 1:400    | 711-065-152 | Dianova, Hamburg, Germany            |
| HRP-labeled anti-rabbit            | goat    | 1:200    | 554021      | BD, Heidelberg, Germany              |
| <b>Immunocytochemistry</b>         |         |          |             |                                      |
| Smad 2/3                           | rabbit  | 1:500    | 8485S       | Cell Signaling, Cambridge, England   |
| THBS1                              | mouse   | 1:100    | ab1823      | Abcam, Cambridge, England            |

|                                    |        |        |             |                                      |
|------------------------------------|--------|--------|-------------|--------------------------------------|
| ZO-1                               | rabbit | 1:100  | 44-2200     | InVitrogen, Carlsbad, CA, USA        |
| Phalloidin iFluor 488              |        | 1:500  | ab176753    | Abcam, Cambridge, England            |
| Cy3-labeled anti-mouse             | goat   | 1:200  | 115-165-003 | Dianova, Hamburg, Germany            |
| AlexaFluor 488-labeled anti-rabbit | goat   | 1:200  | A11008      | Life Technologies, Carlsbad, CA, USA |
| <b>Western blot</b>                |        |        |             |                                      |
| E-cadherin                         | mouse  | 1:2000 | 610182      | BD, Heidelberg, Germany              |
| ZO-1                               | rabbit | 1:700  | 44-2200     | InVitrogen, Carlsbad, CA, USA        |
| N-cadherin                         | rabbit | 1:2000 | 04-1126     | Millipore, Darmstadt, Germany        |
| Smad 2/3                           | rabbit | 1:1000 | 8685S       | Cell Signaling, Cambridge, England   |
| pSmad 2/3                          | rabbit | 1:1000 | 8828S       | Cell Signaling, Cambridge, England   |
| THBS1                              | mouse  | 1:100  | ab1823      | Abcam, Cambridge, England            |
| Vimentin                           | mouse  | 1:1000 |             | Abcam, Cambridge, England            |
| $\alpha$ -SMA                      | rabbit | 1:2000 | ab5694      | Abcam, Cambridge, England            |
| Vinculin                           | mouse  | 1:1000 | 05-386      | Merck, Darmstadt, Germany            |
| GAPDH                              | mouse  | 1:3000 | NB300-221   | Novusbio, Abingdon, England          |
| HRP-labeled anti-mouse             | goat   | 1:5000 | 554002      | BD, Heidelberg, Germany              |
| HRP-labeled anti-rabbit            | goat   | 1:5000 | 554021      | BD, Heidelberg, Germany              |

**Supplementary Table 2. Summary of primer pairs used for semi-quantitative RT-PCR.**

| Gene                                 | Refseq         | Fwd 5'→3'                     | Rev 5'→3'                     |
|--------------------------------------|----------------|-------------------------------|-------------------------------|
| CD36                                 | NM_001044622.1 | TAATGAGACTGGTACAATTG<br>GTGAT | TCATGATGGTAGTGATCTT<br>TTCTCC |
| THBS1<br>(thrombospondin-1)          | NM_001244536.1 | ATCTCCGCATCGCAAAGGA           | ATTGGTAGAGCTGGAGCAACC         |
| PPIA<br>(peptidylprolyl isomerase A) | NM_001435311   | GTCTTCTTCGACATCGCCGT          | GCACGGAAGTTTTCTGCTGTC         |

**Supplementary Table 3. Summary of proteins detected by the Proteome Profiler Human XL Cytokine Array Kit**

|                                     |                |                                     |                  |
|-------------------------------------|----------------|-------------------------------------|------------------|
| Adiponectin                         | FGF-19         | IL-18BP $\alpha$                    | PDGF-AA          |
| Aggregan                            | Flt-3 Ligand   | IL-19                               | PDGF-AB/BB       |
| Angiogenin                          | G-CSF          | IL-22                               | Pentraxin-3      |
| Angiopoietin-1                      | GDF-15GM-CSF   | IL-17A                              | Osteopontin      |
| Angiopoietin-2                      | GRO- $\alpha$  | IL-23IL-24                          | PF4              |
| BAFF                                | Growth Hormone | IL27                                | RAGE             |
| BDNF                                | HGF            | IL-31                               | RANTES           |
| Complement Component C5/C5 $\alpha$ | ICAM-1         | IL-32 $\alpha$ / $\beta$ / $\gamma$ | RBP4             |
| CD14                                | INF- $\gamma$  | IL-33                               | Relaxin-2        |
| CD30                                | IGFBP-2        | IL-34                               | Resistin         |
| CD40 ligand                         | IGFBP-3        | IP-10                               | SDF-1 $\alpha$   |
| Chitinase 3-like 1                  | IL-1 $\alpha$  | I-TAC                               | Serpin E1        |
| Complement Factor D                 | IL-1 $\beta$   | kallikrein 3                        | SHBG             |
| CRP                                 | IL-1 $\alpha$  | Leptin                              | ST2              |
| Cripto-1                            | IL-2           | LIF                                 | TARC             |
| Cystatin C                          | IL-3           | Lipocalin-2                         | TFF3             |
| Dkk-1                               | IL-4           | MCP-1                               | TfR              |
| DPPIV                               | IL-5           | MCP-3                               | TGF- $\alpha$    |
| EGF                                 | IL-6           | M-CSF                               | Thrombospondin-1 |
| EMMPRIN                             | IL-8           | MIF                                 | TNF- $\alpha$    |
| ENA-78                              | IL-10          | MIG                                 | uPAR             |
| Endoglin                            | IL-11          | MIP-1 $\alpha$ /MIP-1 $\beta$       | VEGF             |
| Fas Ligand                          | IL-12p70       | MIP-3 $\alpha$                      | Vitamin D BP     |
| FGF basic                           | IL-13          | MIP-3 $\beta$                       |                  |
| FGF-7                               | IL-15          | MMP-9                               |                  |
|                                     | IL-16          | Myeloperoxidase                     |                  |
